# Supplementary material
Source: PubMed Central journal article supplement (PMC8759032)
Supplement: NIHMS1752946-supplement-Supplement.pdf [file NIHMS1752946-supplement-Supplement.pdf]

SUPPLEMENTAL MATERIAL

Supplemental Tables:

---

**Table I. Interview Guide Topics**

- 1. Let's start by having you describe what you do.**
- 2. Please describe your hospital's policies and practices related to preventing IHCA and selecting patients appropriate for resuscitation care.**
- 3. Please describe the process by which your hospital responds to the event of IHCA.**
- 4. Please describe how your hospital cares for patients following IHCA if they survive.**
- 5. Who is responsible for oversight and QI efforts related to IHCA at your hospital? (e.g., CPR committee)**
- 6. In the last 3 years, please describe the major initiatives your hospital has undertaken to improve care of patients with IHCA.**
- 7. Please describe your perception of administrative support for QI efforts and specifically for initiatives related to IHCA at your hospital.**
- 8. If you could change one thing about the IHCA care processes at your hospital, what would it be?**
- 9. If you were helping other hospitals improve IHCA care, how would you recommend they structure a program?**

IHCA = In-Hospital Cardiac Arrest; CPR = Cardiopulmonary Resuscitation;

QI = Quality Improvement

---

As previously described.<sup>8</sup>
